# Supplementary material for: Design of experiment (DOE) applied to artificial neural network architecture enables rapid bioprocess improvement
Source: PubMed Central journal article supplement (PMC8144078; doi:10.1007/s00449-021-02529-3), 2021-02-27
Supplement: 449_2021_2529_MOESM2_ESM.pdf [file 449_2021_2529_MOESM2_ESM.pdf]

# Online Resource 2 for Design of Experiment (DOE) Applied to Artificial Neural Network Architecture Enables Rapid Bioprocess Improvement

Journal: Bioprocess and Biosystems Engineering

Daniel Rodriguez-Granrose<sup>1,2</sup>, Amanda Jones<sup>1</sup>, Hannah Loftus<sup>1</sup>, Terry Tandeski<sup>1</sup>, Will Heaton<sup>1</sup>, Kevin T Foley<sup>1,3,4</sup>, Lara Silverman<sup>1,3</sup>

## Affiliations:

<sup>1</sup> DiscGenics Inc, Salt Lake City, Utah, USA

<sup>2</sup> Department of Biochemistry and Molecular Biology, University of Miami, Miami, FL, USA

<sup>3</sup> Department of Neurosurgery, University of Tennessee Health Science Center, Memphis, Tennessee, USA

<sup>4</sup> Semmes-Murphey Clinic, Memphis, Tennessee, USA

## Corresponding Author:

Daniel Rodriguez-Granrose

daniel@discgenics.com

| Inputs (ANN architecture used to model bioprocess dataset) |                  |                    |                |                  |                    | Outputs (How well the ANN models the bioprocess dataset) |                |               |              |
|------------------------------------------------------------|------------------|--------------------|----------------|------------------|--------------------|----------------------------------------------------------|----------------|---------------|--------------|
| TanH Layer                                                 | 1st Linear Layer | 1st Gaussian Layer | 1st TanH Layer | 2nd Linear Layer | 2nd Gaussian Layer | 2nd RSQUARE Training                                     | -RSQUARE Delta | -SSE Training | -SSE - Delta |
| 0                                                          | 0                | 100                | 0              | 0                | 0                  | 0.999687                                                 | 0.0711758      | 0.0215997     | -2.3933148   |
| 100                                                        | 100              | 0                  | 100            | 0                | 50                 | 0.1873044                                                | 0.7502407      | 56.087049     | 53.9773016   |
| 0                                                          | 0                | 100                | 100            | 0                | 100                | 0.9993744                                                | 0.0762362      | 0.0431736     | -2.5532447   |
| 100                                                        | 0                | 100                | 0              | 100              | 0                  | 0.9985026                                                | 0.1394487      | 0.1033434     | -4.6578616   |
| 0                                                          | 0                | 100                | 100            | 100              | 0                  | 0.9997088                                                | 0.0695394      | 0.0200966     | -2.3388036   |
| 50                                                         | 100              | 50                 | 50             | 0                | 0                  | 0.9189367                                                | 0.0193819      | 5.5944703     | 3.5108509    |
| 0                                                          | 0                | 100                | 0              | 100              | 100                | 0.999608                                                 | 0.0743947      | 0.0270524     | -2.499267    |
| 0                                                          | 0                | 0                  | 100            | 100              | 100                | 0.9189352                                                | 0.0371155      | 5.594576      | 4.1099548    |
| 0                                                          | 0                | 0                  | 100            | 0                | 0                  | 0.9168164                                                | 0.0498224      | 5.7408028     | 4.6138508    |
| 50                                                         | 50               | 0                  | 100            | 0                | 100                | 0.9994455                                                | 0.0776931      | 0.0382676     | -2.6049618   |
| 100                                                        | 50               | 100                | 50             | 50               | 50                 | 0.9005349                                                | 0.0438728      | 6.8644468     | 4.9865209    |
| 0                                                          | 100              | 100                | 100            | 100              | 100                | 0.8358272                                                | 0.1015769      | 11.330157     | 9.2156471    |
| 100                                                        | 100              | 100                | 0              | 0                | 100                | 0.9961297                                                | 0.0866709      | 0.2671026     | -2.7914097   |
| 0                                                          | 100              | 0                  | 100            | 100              | 0                  | 0.775615                                                 | -0.0922156     | 15.485614     | 11.0208884   |
| 0                                                          | 50               | 50                 | 50             | 0                | 100                | 0.9691776                                                | 0.0811206      | 2.1271661     | -1.6543049   |
| 0                                                          | 0                | 0                  | 0              | 100              | 0                  | 0.8836801                                                | -0.0846751     | 8.0276525     | 6.958681     |
| 100                                                        | 100              | 50                 | 100            | 50               | 100                | 0.9740413                                                | 0.1837166      | 1.7915025     | -5.2913975   |
| 50                                                         | 0                | 0                  | 0              | 0                | 50                 | 0.9522421                                                | 0.0482541      | 3.2959418     | 0.0526238    |
| 100                                                        | 0                | 0                  | 100            | 100              | 0                  | 0.7756116                                                | -0.0938328     | 15.485848     | 11.0756368   |
| 100                                                        | 100              | 100                | 100            | 100              | 0                  | 0.7754898                                                | -0.0984621     | 15.494256     | 11.2363088   |
| 100                                                        | 50               | 0                  | 0              | 100              | 100                | 0.9996096                                                | 0.0577091      | 0.0269458     | -1.9356742   |
| 100                                                        | 100              | 0                  | 0              | 50               | 0                  | 0.7756353                                                | -0.092383      | 15.484214     | 11.0258289   |
| 100                                                        | 50               | 50                 | 0              | 0                | 0                  | 0.9539576                                                | 0.0496907      | 3.1775544     | -0.0563417   |
| 100                                                        | 100              | 50                 | 0              | 100              | 50                 | 0.9441617                                                | 0.0369218      | 3.8536011     | 0.7201343    |
| 100                                                        | 0                | 100                | 100            | 100              | 100                | 0.9566807                                                | -0.0025323     | 2.9896205     | 1.6118228    |
| 50                                                         | 0                | 50                 | 0              | 50               | 100                | 0.9460516                                                | 0.0293787      | 3.7231761     | 0.9083586    |
| 50                                                         | 100              | 0                  | 50             | 100              | 100                | 0.7755625                                                | -0.0910965     | 15.489241     | 10.9849368   |
| 0                                                          | 100              | 100                | 0              | 100              | 0                  | 0.7756256                                                | -0.0934072     | 15.484884     | 11.0607693   |
| 100                                                        | 0                | 100                | 100            | 0                | 0                  | 0.9157224                                                | -0.0342583     | 5.8163032     | 4.1266358    |
| 0                                                          | 100              | 0                  | 0              | 0                | 100                | 0.9997102                                                | 0.0581763      | 0.02          | -1.955005    |
| 100                                                        | 0                | 0                  | 50             | 0                | 100                | 0.9653943                                                | 0.0498319      | 2.3882653     | -0.4640645   |

|   |     |     |     |   |   |           |           |           |            |
|---|-----|-----|-----|---|---|-----------|-----------|-----------|------------|
| 0 | 100 | 100 | 100 | 0 | 0 | 0.9983386 | 0.0213536 | 0.1146583 | -0.6627966 |
|---|-----|-----|-----|---|---|-----------|-----------|-----------|------------|

**Online Resource 2 Table of ANN-DOE Hybrid Functions and Outputs** The table shows architecture and responses of each ANN which modeled doublings using the bioprocess dataset. We used all values in this table, ran an SLS regression model of inputs functions on responses, removed model inputs which were not statistically significant. Using the maximize desirability function in JMP Pro 14 we found 91-94 gaussian neurons as the maximally desirable ANN configuration.
