# Supplementary material for: Design of experiment (DOE) applied to artificial neural network architecture enables rapid bioprocess improvement
Source: PubMed Central journal article supplement (PMC8144078; doi:10.1007/s00449-021-02529-3), 2021-02-27
Supplement: 449_2021_2529_MOESM3_ESM.pdf [file 449_2021_2529_MOESM3_ESM.pdf]

**Online Resource 3 for Design of Experiment (DOE) Applied to Artificial Neural Network Architecture Enables Rapid Bioprocess Improvement**

**Journal: Bioprocess and Biosystems Engineering**

**Daniel Rodriguez-Granrose<sup>1,2</sup>, Amanda Jones<sup>1</sup>, Hannah Loftus<sup>1</sup>, Terry Tandeski<sup>1</sup>, Will Heaton<sup>1</sup>, Kevin T Foley<sup>1,3,4</sup>, Lara Silverman<sup>1,3</sup>**

**Affiliations:**

<sup>1</sup> DiscGenics Inc, Salt Lake City, Utah, USA

<sup>2</sup> Department of Biochemistry and Molecular Biology, University of Miami, Miami, FL, USA

<sup>3</sup> Department of Neurosurgery, University of Tennessee Health Science Center, Memphis, Tennessee, USA

<sup>4</sup> Semmes-Murphy Clinic, Memphis, Tennessee, USA

**Corresponding Author:**

Daniel Rodriguez-Granrose

daniel@discgenics.com

|          | Summary Statistics  | R <sup>2</sup> Training | R <sup>2</sup> Delta | SSE Training | SSE Delta |
|----------|---------------------|-------------------------|----------------------|--------------|-----------|
|          | Mean                | 0.92                    | 0.07                 | 5.24         | 4.37      |
|          | Standard Deviation  | 0.08                    | 0.04                 | 5.70         | 3.82      |
|          | Standard Error Mean | 0.01                    | 0.01                 | 1.01         | 0.68      |
|          | Upper 95% Mean      | 0.95                    | 0.08                 | 7.29         | 5.75      |
|          | Lower 95% Mean      | 0.89                    | 0.05                 | 3.18         | 2.99      |
|          | N                   | 32.00                   | 32.00                | 32.00        | 32.00     |
|          | Quantiles           | R <sup>2</sup> Training | R <sup>2</sup> Delta | SSE Training | SSE Delta |
| maximum  | 100.00%             | 1.00                    | 0.18                 | 15.49        | 11.24     |
|          | 99.50%              | 1.00                    | 0.18                 | 15.49        | 11.24     |
|          | 97.50%              | 1.00                    | 0.18                 | 15.49        | 11.24     |
|          | 90.00%              | 1.00                    | 0.10                 | 15.49        | 11.05     |
| quartile | 75.00%              | 1.00                    | 0.09                 | 7.74         | 6.54      |
| median   | 50.00%              | 0.95                    | 0.07                 | 3.24         | 2.70      |
| quartile | 25.00%              | 0.89                    | 0.04                 | 0.11         | 1.62      |
|          | 10.00%              | 0.78                    | 0.02                 | 0.02         | 0.52      |
|          | 2.50%               | 0.78                    | 0.00                 | 0.02         | 0.05      |
|          | 0.50%               | 0.78                    | 0.00                 | 0.02         | 0.05      |
| minimum  | 0.00%               | 0.78                    | 0.00                 | 0.02         | 0.05      |

**Online Resource 3 Table of ANN Quantile Summary Statistics** The number here shows the values which complement quantile box plots within manuscript Fig 2: ANN Models Quality Distribution. The numbers from online Resource 3 were created using JMP Pro v. 14
