# Supplementary material for: Design of experiment (DOE) applied to artificial neural network architecture enables rapid bioprocess improvement
Source: PubMed Central journal article supplement (PMC8144078; doi:10.1007/s00449-021-02529-3), 2021-02-27
Supplement: 449_2021_2529_MOESM4_ESM.pdf [file 449_2021_2529_MOESM4_ESM.pdf]

# Online Resource 4 for Design of Experiment (DOE) Applied to Artificial Neural Network Architecture Enables Rapid Bioprocess Improvement

Journal: Bioprocess and Biosystems Engineering

Daniel Rodriguez-Granrose<sup>1,2</sup>, Amanda Jones<sup>1</sup>, Hannah Loftus<sup>1</sup>, Terry Tandeski<sup>1</sup>, Will Heaton<sup>1</sup>, Kevin T Foley<sup>1,3,4</sup>, Lara Silverman<sup>1,3</sup>

## Affiliations:

<sup>1</sup> DiscGenics Inc, Salt Lake City, Utah, USA

<sup>2</sup> Department of Biochemistry and Molecular Biology, University of Miami, Miami, FL, USA

<sup>3</sup> Department of Neurosurgery, University of Tennessee Health Science Center, Memphis, Tennessee, USA

<sup>4</sup> Semmes-Murphey Clinic, Memphis, Tennessee, USA

## Corresponding Author:

Daniel Rodriguez-Granrose  
daniel@discgenics.com

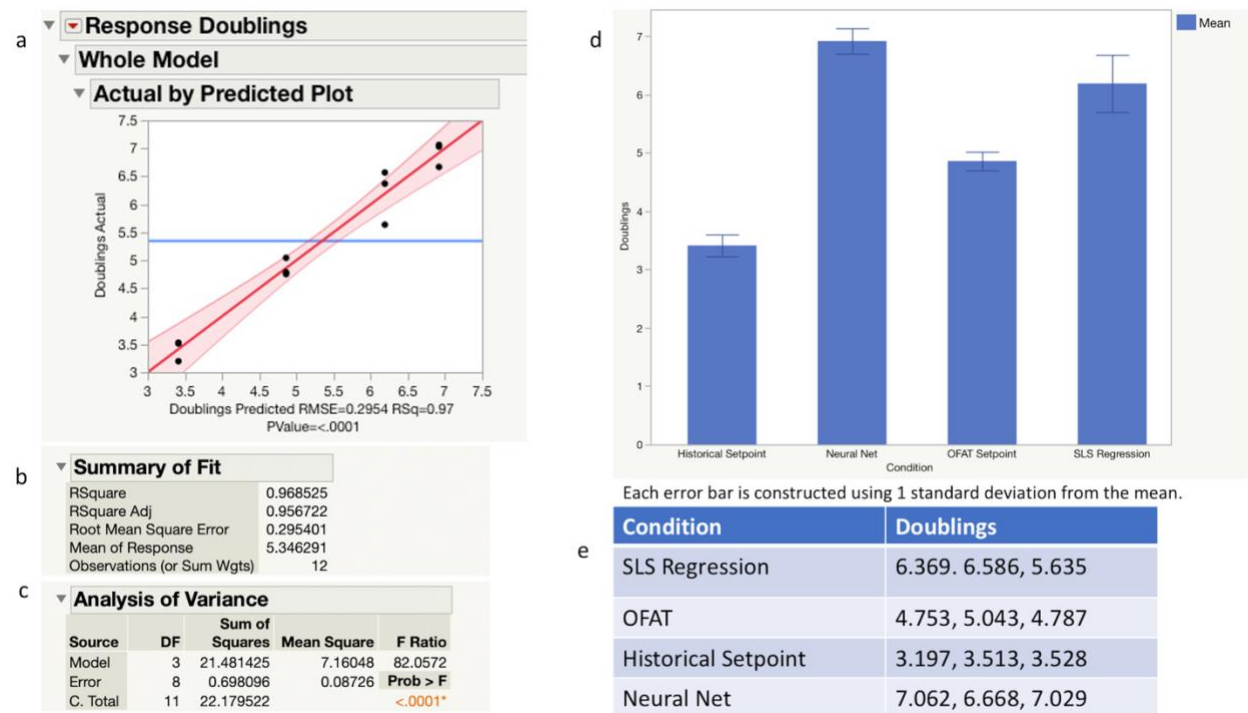

**Online Resource 4 a: Regression Model of the Four Tested Bioprocess Setpoints** The regression model compares doublings compared by our four process setpoints. We show a strong regression line with **b: summary of fit** ( $R^2 = 0.97$ ), **c: ANOVA table** ( $P < 0.001$ ) and actual values. This model provides the basis for Fig 4C within the manuscript **d: doubling bar graphs**

and **e: doubling values for individual flasks by bioprocess setpoints** Online Resource 4 was created using JMP Pro v. 14
